# Supplementary material for: Synthesis of water-soluble ionic terpolymers by inverse microemulsion and solution polymerization methods
Source: Royal Society of Chemistry journal article supplement (doi:10.1039/d2ra01173e), 2022-01-01
Supplement: d2ra01173e1.pdf [file d2ra01173e1.pdf]

## Supporting Information

### Synthesis of water-soluble ionic terpolymers by inverse microemulsion and solution polymerization methods

Evelyn Y. Calvillo-Muñoz<sup>a</sup>, Araceli Vega-Paz<sup>b</sup>, Diego Guzman-Lucero<sup>b</sup>, Irina V. Lijanova<sup>a</sup>, O. Olivares-Xometl<sup>c</sup>, Natalya V. Likhanova<sup>b\*</sup>

<sup>a</sup>Instituto Politécnico Nacional, CIITEC, Cerrada Cecati S/N, Colonia Santa Catarina de Azcapotzalco, CP 02250, CDMX, México.

<sup>b</sup>Instituto Mexicano del Petróleo, Eje Central Norte Lázaro Cárdenas No. 152, col. San Bartolo Atepehuacan, G. A. Madero, 07730 CDMX, México.

<sup>c</sup>Benemérita Universidad Autónoma de Puebla, Facultad de Ingeniería Química, Av. San Claudio y 18 Sur, Ciudad Universitaria. Col. San Manuel, 72570 Puebla, Puebla, México.

\* e-mail: nvictoro@imp.mx

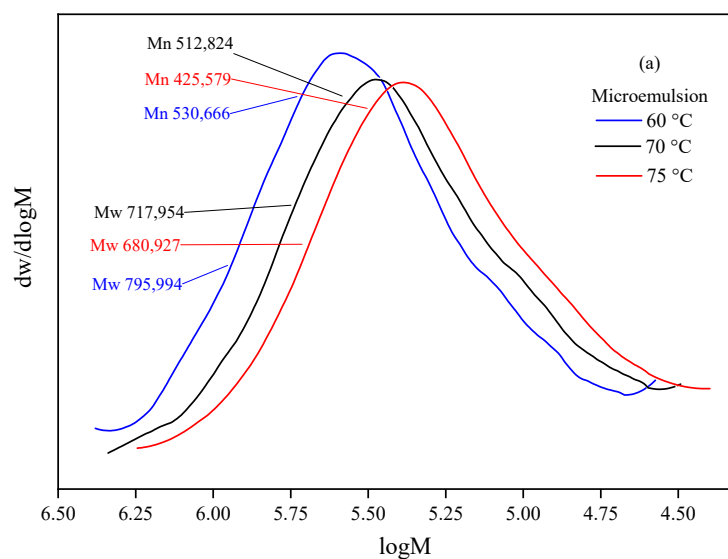

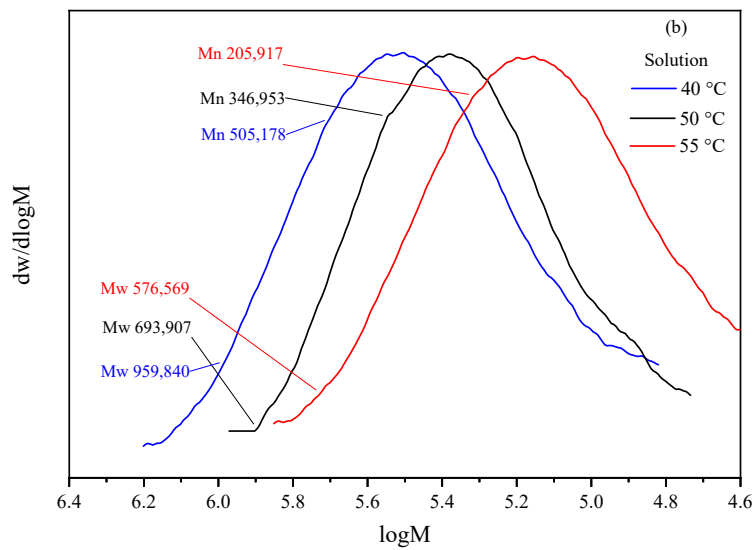

**Figure S1.** GPC of terpolymers by a) microemulsion method, b) solution method.
